# Supplementary material for: Stress, strain and deformation of poly-lactic acid filament deposited onto polyethylene terephthalate woven fabric through 3D printing process
Source: PubMed Central journal article supplement (PMC6778127; doi:10.1038/s41598-019-50832-7), 2019-10-04
Supplement: 41598_2019_50832_MOESM1_ESM.pdf [file 41598_2019_50832_MOESM1_ESM.pdf]

# **Stress, strain and deformation of poly-lactic acid filament deposited onto polyethylene terephthalate woven fabric through 3D printing process**

**Prisca Aude Eutionnat-Diffo ·**

**Yan Chen · Jinping Guan ·**

**Aurelie Cayla · Christine Campagne ·**

**Xianyi Zeng · Vincent Nierstrasz**

---

*Corresponding author:* Prisca Aude Eutionnat-Diffo

Textile Materials Technology, Department of Textile Technology, Faculty of Textiles, Engineering and Business, University of Borås, Borås, 50190, Sweden

Laboratoire de Génie et Matériaux Textiles, ENSAIT/GEMTEX, Lille, 59000, France

College of Textile and Clothing Engineering, Soochow University, Suzhou, 215006, Jiangsu, China

*Correspondance to:* E-mail: [prisca.eutionnat-diffo@ensait.fr](mailto:prisca.eutionnat-diffo@ensait.fr)/ [prisca.eutionnat@hb.se](mailto:prisca.eutionnat@hb.se)

Yan Chen

College of Textile and Clothing Engineering, Soochow University, Suzhou, 215006, Jiangsu, China

E-mail: [yanchen@suda.edu.cn](mailto:yanchen@suda.edu.cn)

Jinping Guan

College of Textile and Clothing Engineering, Soochow University, Suzhou, 215006, Jiangsu, China

E-mail: [guanjinping@suda.edu.cn](mailto:guanjinping@suda.edu.cn)

Aurelie Cayla

Laboratoire de Génie et Matériaux Textiles, ENSAIT/GEMTEX, 59000, Lille, France

Email: [aurelie.cayla@ensait.fr](mailto:aurelie.cayla@ensait.fr)

Christine Campagne

Laboratoire de Génie et Matériaux Textiles, ENSAIT/GEMTEX, 59000, Lille, France

E-mail: [christine.campagne@ensait.fr](mailto:christine.campagne@ensait.fr)

Xianyi Zeng

Laboratoire de Génie et Matériaux Textiles, ENSAIT/GEMTEX, 59000, Lille, France

Email: [xianyi.zeng@ensait.fr](mailto:xianyi.zeng@ensait.fr)

Vincent Nierstrasz

Textile Materials Technology, Department of Textile Technology, Faculty of Textiles, Engineering and Business, University of Borås, Borås, 50190, Sweden

E-mail: [vincent.nierstrasz@hb.se](mailto:vincent.nierstrasz@hb.se)

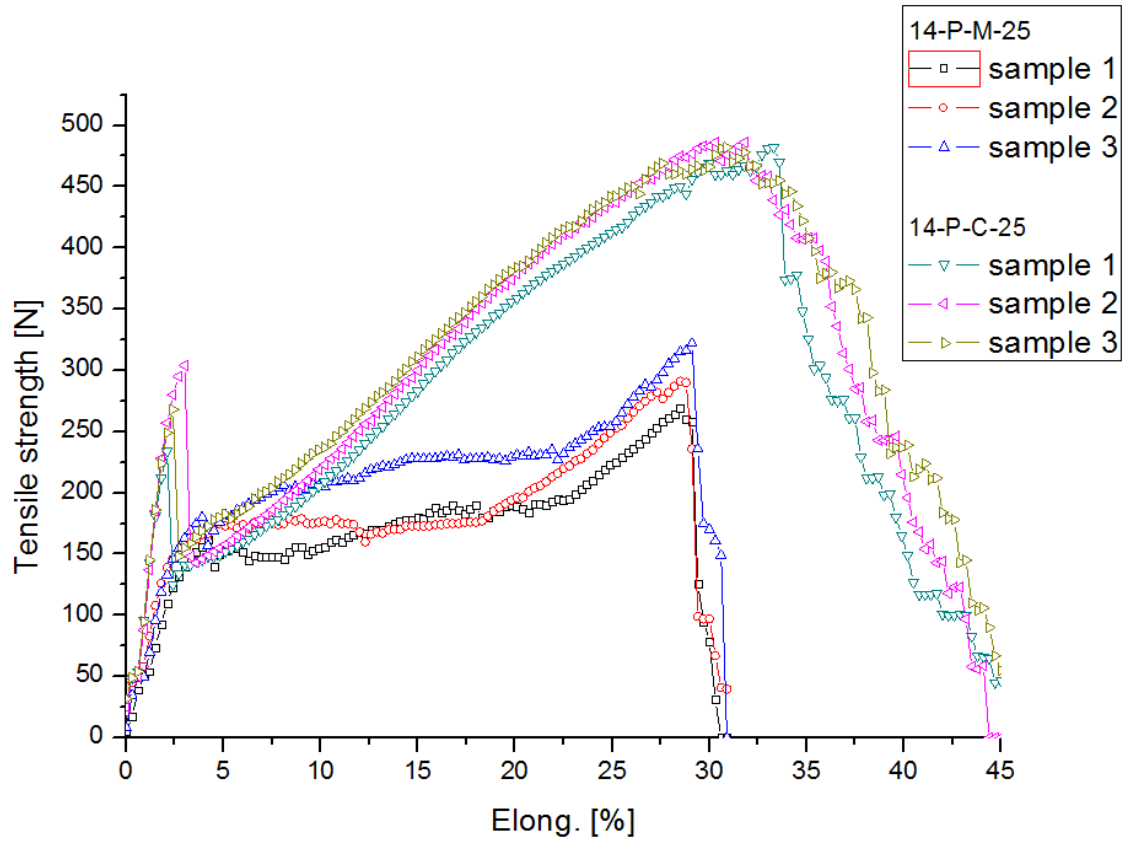

**Fig. 1 Tensile force–Elongation curves (three replicates) of 3D-PPOT using PLA filament printed on 14 picks/inch PET woven fabric at 25°C in cross direction (14-P-C-25) and machine direction (14-P-M-25).**
